# Supplementary material for: Creatine supplementation strategies aimed at acutely increasing and maintaining skeletal muscle total creatine content in healthy, young volunteers
Source: publisher site journal article supplement (doi:10.1515/teb-2024-0032), 2024-09-01
Supplement: Supplementary file 1 [file j_teb-2024-0032_suppl_001.docx]

**Supplementary Table 1**:

Maximum plasma creatine concentration [and time to concentration maximum] following supplement ingestion at baseline (day 0), and after 5 (day 6) and 33 (day 34) days supplementation with: **Cr** (4x5g Cr per day for 5 days, followed by 5g Cr per day for a further 28 days); **CrCHO1** (4x5g Cr per day + 95g of dextrose for 5 days, followed by 5g Cr per day for a further 28 days); **CrCHO2** (4x5g Cr per day + 95g of dextrose for 5 days, followed by 5g Cr + 95g of dextrose per day for a further 28 days); **CrPAC** (4x5g Cr per day + 14g protein hydrolysate, 7g phenylalanine, 7g leucine, and 57g dextrose, followed by 5g Cr per day + 14g protein hydrolysate, 7g phenylalanine, 7g leucine, and 57g dextrose for a further 28 days).

| Group | **0 days**  (umol/l) | **After 5 days**  (umol/l) | **After 33 days**  (umol/l) |
| --- | --- | --- | --- |
| Cr | 973 ± 94 [60 min] | 1288 ± 103 [80 min] | 1168 ± 77 [80 min] |
| CrCHO | 679 ± 30 [120 min] | CrCHO1 1292 ± 95 [60 min]  CrCHO2 846 ± 87 [120 min] | CrCHO1 1274 ± 49 [60 min]  CrCHO2 931 ± 69 [120 min] |
| CrPAC | 604 ± 68 [100 min] | 934 ± 76 [120 min] | 853 ± 84 [120 min] |
